# Supplementary material for: Unveiling the synergistic mechanism of the NiSe 2 /CoSeO 3 heterointerface in enhancing the oxygen evolution reaction kinetics
Source: Royal Society of Chemistry journal article supplement (doi:10.1039/d5tc03533c), 2025-12-15
Supplement: d5tc03533c1.pdf [file d5tc03533c1.pdf]

## Supporting Information:

Reversible hydrogen electrode potential conversion. In electrochemical measurements, the applied bias voltage is converted to a potential relative to the RHE using the Nernst equation (Equation 1). A three-electrode configuration was employed in the experiment, with foam nickel, NF-NiSe<sub>2</sub>, and NF-NiSe<sub>2</sub>/CoSeO<sub>3</sub> electrodes serving as the working electrodes, a Pt electrode as the counter electrode, and a Hg/HgO electrode as the reference electrode.

$$E_{RHE} = E_{Hg/HgO} + 0.059 pH + 0.098 \quad (1)$$

where Hg/HgO is the bias pressure applied relative to the Hg/HgO electrode with a pH of 13.9.

The double-layer capacitance current is calculated as half of the difference between the anodic and cathodic currents ( $\Delta j = j_a - j_c$ ) in the CV curve. A linear fit is performed with the scan rate, and the slope of the resulting line corresponds to 2Cdl, from which the Cdl value is then calculated.

### Supplementary Note.

Fig. S1 SEM morphology of NiSe<sub>2</sub> and corresponding Ni and Se element mappings.

Fig. S2 SEM morphology of NF.

Fig. S3 TEM and HRTEM images of NiSe<sub>2</sub>/CoSeO<sub>3</sub>.

Fig. S4 XPS high-resolution spectrum of Co in NiSe<sub>2</sub>/CoSeO<sub>3</sub>.

Fig. S5 CV curves corresponding to the calculated Cdl of nickel foam, NF-NiSe<sub>2</sub>, and NF-NiSe<sub>2</sub>/CoSeO<sub>3</sub>.

Fig S6 Enlarged view of the Cdl for nickel foam and NF-NiSe<sub>2</sub>.

Fig S7 Impedance fitting circuit diagram at open-circuit potential.

Fig.S8 27-hour stability test of NF-NiSe<sub>2</sub> and NF-NiSe<sub>2</sub>/CoSeO<sub>3</sub>.

Table S1 Fitting values corresponding to the impedance spectra equivalent circuit diagram.

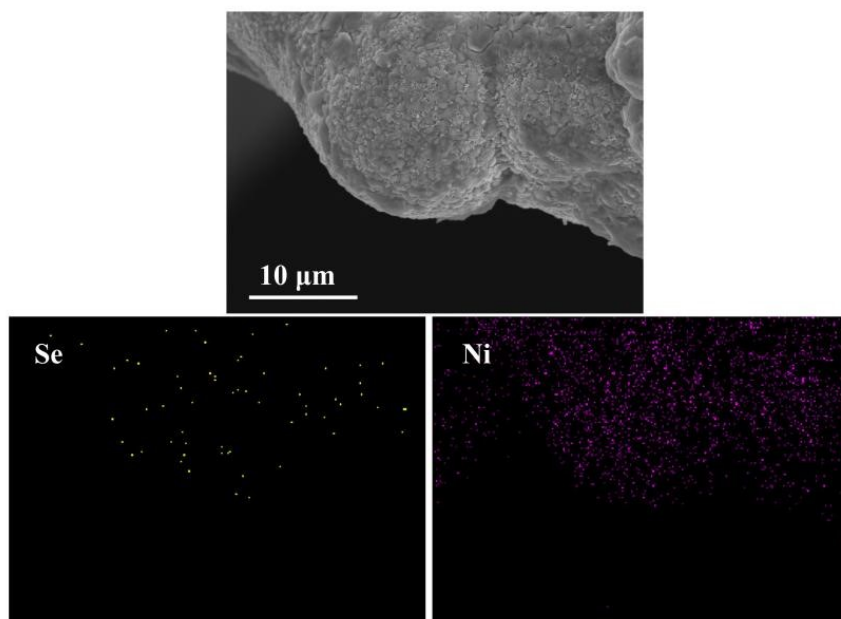

Fig. S1 SEM morphology of  $\text{NiSe}_2$  and corresponding Ni and Se element mappings.

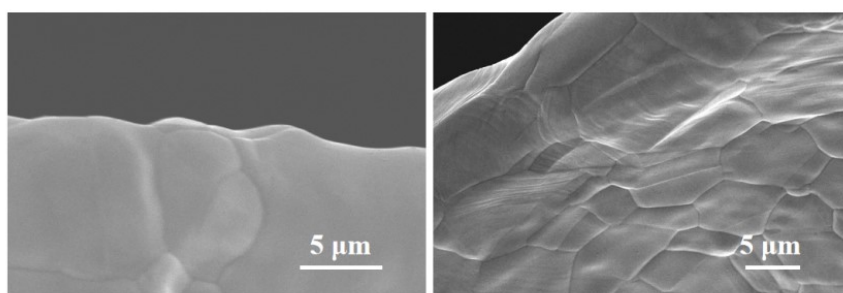

Fig. S2 SEM morphology of NF.

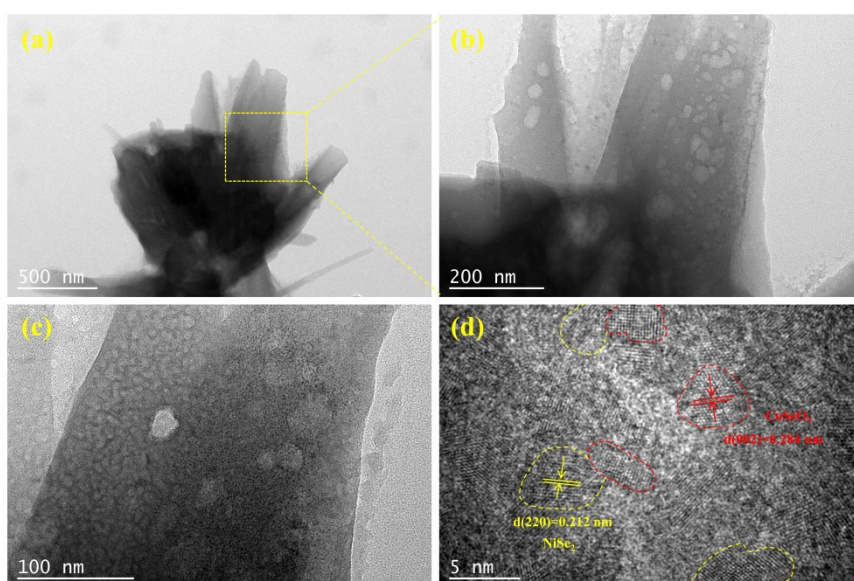

Fig. S3 TEM and HRTEM images of  $\text{NiSe}_2/\text{CoSeO}_3$ .

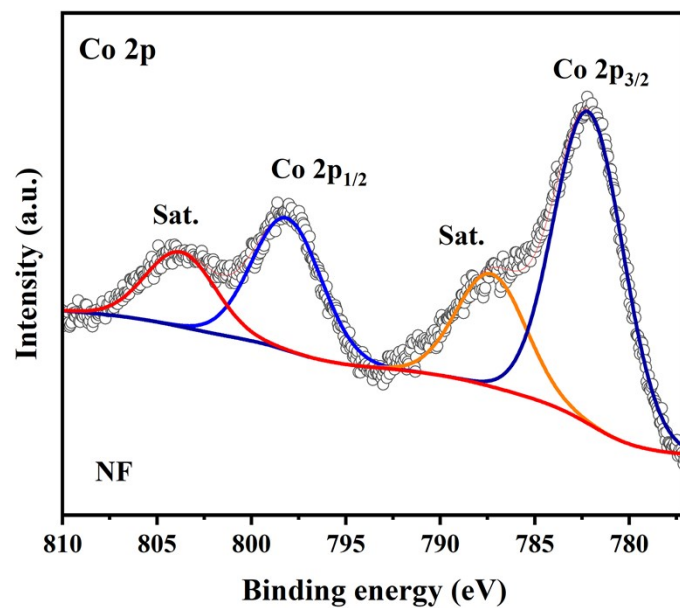

Fig. S4 XPS high-resolution spectrum of Co in NiSe<sub>2</sub>/CoSeO<sub>3</sub>.

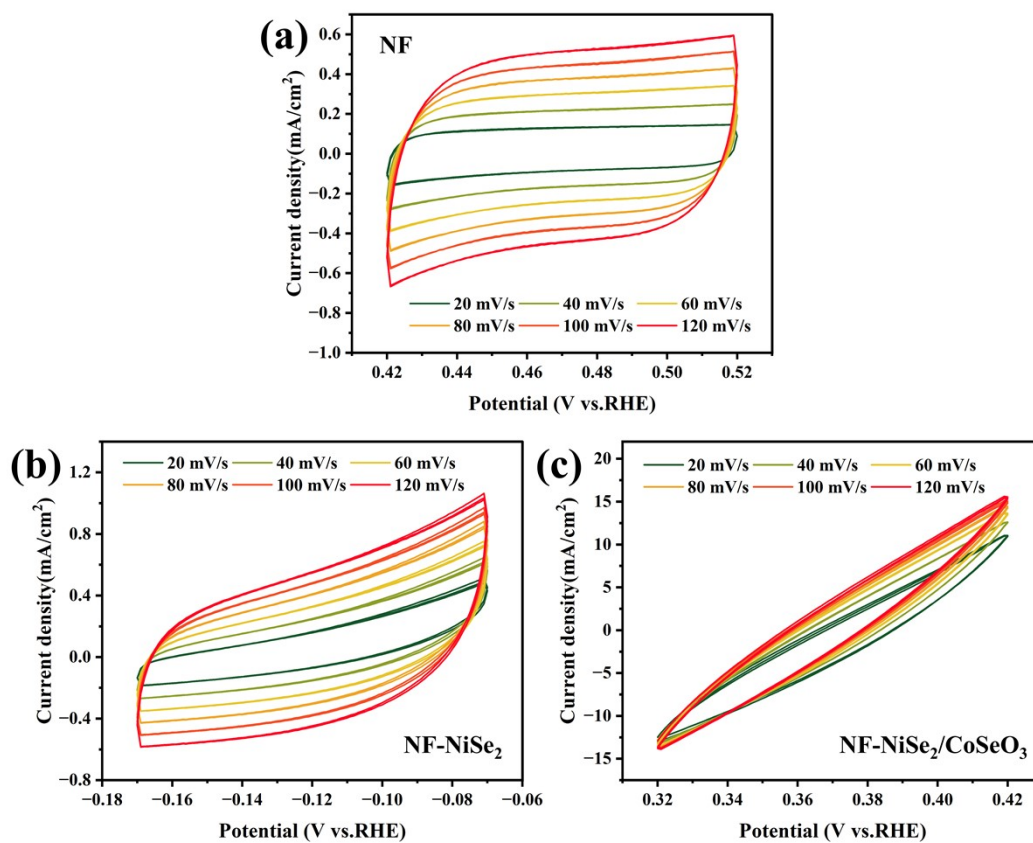

Fig. S5 CV curves corresponding to the calculated Cdl of nickel foam, NF-NiSe<sub>2</sub>, and NF-NiSe<sub>2</sub>/CoSeO<sub>3</sub>.

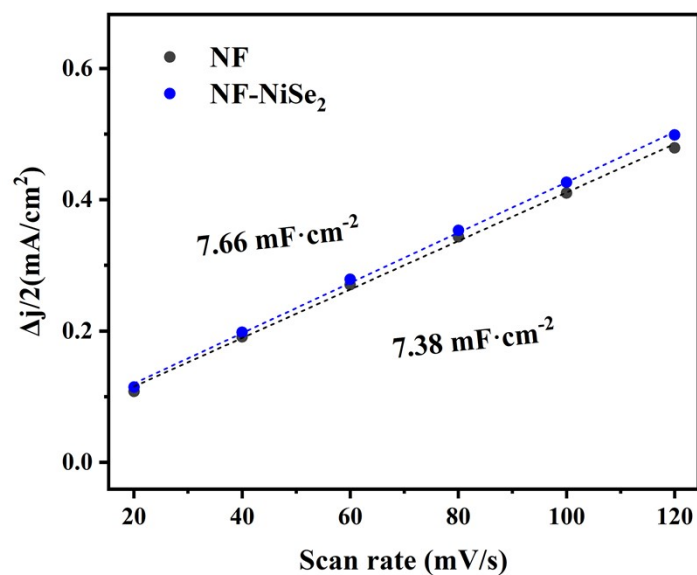

Fig S6 Enlarged view of the Cdl for nickel foam and NF-NiSe<sub>2</sub>.

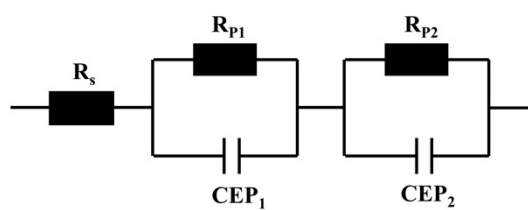

Fig S7 Impedance fitting circuit diagram at open-circuit potential.

Supplementary Note 1 In the equivalent circuit,  $R_s$  represents the Ohmic resistance of the electrolyte, electrode, and their contact interface;  $R_p$  represents the impedance of charge transfer at the electrode/electrolyte interface, reflecting the kinetics of the electrocatalytic reaction; CPE describes the double-layer capacitance at the interface and the roughness or heterogeneity of the electrode surface.

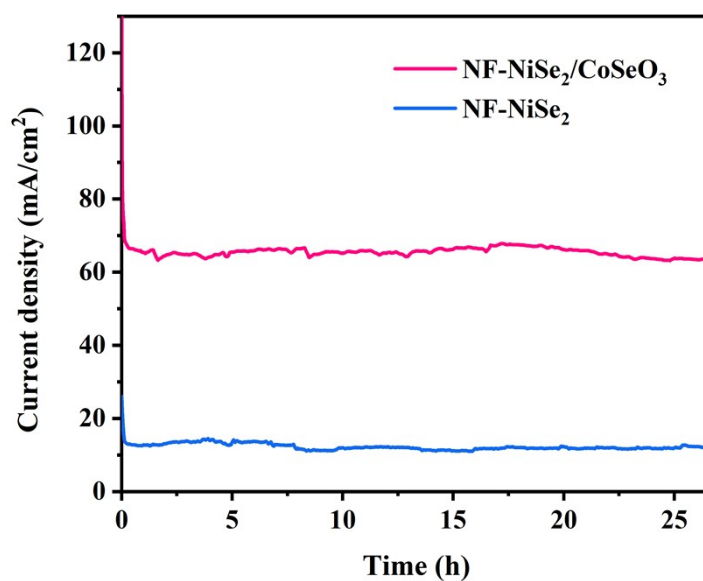

Fig.S7 27-hour stability test of NF-NiSe<sub>2</sub> and NF-NiSe<sub>2</sub>/CoSeO<sub>3</sub>.

Table S1 Fitting values corresponding to the impedance spectra equivalent circuit diagram.

| Samples                                  | $R_s$ | $R_{p1}$ | $\alpha_1$ | $R_{p2}$ | $\alpha_2$ |
|------------------------------------------|-------|----------|------------|----------|------------|
| NF                                       | 2.309 | 614.3    | 0.540      | 72.24    | 0.945      |
| NF-NiSe <sub>2</sub>                     | 2.063 | 396.7    | 0.708      | 66.17    | 1.157      |
| NF-NiSe <sub>2</sub> /CoSeO <sub>3</sub> | 2.763 | 210.3    | 0.785      | 59.28    | 1.337      |
